# Supplementary material for: Attaining functional levels of visual acuity after vitrectomy for retinal detachment secondary to proliferative diabetic retinopathy
Source: PubMed Central journal article supplement (PMC7519031; doi:10.1038/s41598-020-72618-y), 2020-09-24
Supplement: 41598_2020_72618_MOESM1_ESM.pdf [file 41598_2020_72618_MOESM1_ESM.pdf]

**Attaining functional levels of visual acuity after vitrectomy for retinal detachment secondary to proliferative diabetic retinopathy**

Aaron Ricca, MD, Kiley Boone, BA, H. Culver Boldt, MD, Karen M. Gehrs, MD, Stephen R. Russell, MD, James C. Folk, MD, M. Bridget Zimmerman, PhD, Mark E. Wilkinson, OD, Elliott H. Sohn, MD

**Supplemental table 1. Number of patients included and reasons for exclusion**

|                                                                   |     |
|-------------------------------------------------------------------|-----|
| Total patients in initial broad search                            | 697 |
| Reasons for exclusion                                             |     |
| Insufficient data                                                 | 11  |
| No pars plana vitrectomy (PPV)                                    | 40  |
| Wrong time frame                                                  | 14  |
| Previous PPV in same eye                                          | 18  |
| No diabetes mellitus                                              | 182 |
| No proliferative diabetic retinopathy                             | 12  |
| No traction retinal detachment present at time of vitrectomy      | 217 |
| Total patients excluded                                           | 494 |
| Total number of patients meeting inclusion and exclusion criteria | 203 |
| Total number of eyes meeting inclusion and exclusion criteria     | 240 |
