# Supplementary material for: Attaining functional levels of visual acuity after vitrectomy for retinal detachment secondary to proliferative diabetic retinopathy
Source: PubMed Central journal article supplement (PMC7519031; doi:10.1038/s41598-020-72618-y), 2020-09-24
Supplement: 41598_2020_72618_MOESM2_ESM.pdf [file 41598_2020_72618_MOESM2_ESM.pdf]

## Attaining functional levels of visual acuity after vitrectomy for retinal detachment secondary to proliferative diabetic retinopathy

Aaron Ricca, MD, Kiley Boone, BA, H. Culver Boldt, MD, Karen M. Gehrs, MD, Stephen R. Russell, MD, James C. Folk, MD, M. Bridget Zimmerman, PhD, Mark E. Wilkinson, OD, Elliott H. Sohn, MD

### Supplemental table 2. Patient demographics of those who presented for 3 month follow-up.

|                                         | N (eyes) | %  |
|-----------------------------------------|----------|----|
| Gender                                  |          |    |
| Male                                    | 106      | 52 |
| Female                                  | 96       | 48 |
| Tamponade agent used at time of surgery |          |    |
| C3F8                                    | 45       | 22 |
| SF6                                     | 43       | 21 |
| Air                                     | 26       | 13 |
| No tamponade                            | 68       | 34 |
| Silicone Oil                            | 19       | 9  |
| Vitreous hemorrhage                     |          |    |
| Present                                 | 151      | 77 |
| Absent                                  | 45       | 23 |
| Lens status                             |          |    |
| Phakic                                  | 180      | 90 |
| Pseudophakic                            | 20       | 10 |
| Smoking status                          |          |    |
| Smoker                                  | 38       | 20 |
| Non-smoker                              | 155      | 80 |
| Laterality                              |          |    |
| OD                                      | 106      | 44 |
| OS                                      | 134      | 56 |
| 1 or 2 operated eyes                    |          |    |
| Single                                  | 166      | 82 |
| Both                                    | 37       | 18 |
| Presence of RRD                         |          |    |
| TRD alone                               | 175      | 88 |

TRD/RRD combined

28

12
